# Supplementary material for: Next-Generation Computationally Designed Influenza Hemagglutinin Vaccines Protect against H5Nx Virus Infections
Source: MDPI journal article supplement (doi:10.3390/pathogens10111352), 2021-10-20
Supplement: s1 [file s1]

Supplementary Materials

IAN1

MEKIVLLAVVSLVKSQDQICIGYHANNSTEQVDTIMEKNVTVTHAQDILEKTHNGKLCDLNGVKPLILKDCSVAGWLLGNPMCDEFLNV  
PEWSYIVEKANPANGLCYPGNFNDYEELKHLISRINHFEKIQIIPKSSWSNHEASSGVSSACPYQGRSSFFRNVVWLICKNNAYPTIKR  
SYNNTNQEDLLILWGIHPNDAAEQTKLYQNPTTYVSVGTSTLNQRLVPKIATRISKVNGQSGRMEFFWTILKPNDAINFESNGNFIAP  
YAYKIVKKGDSAIMKSELEYGNCNTKCQTPIGAINSSMPFHNIHPLTIGECPKYVKSBNKLVLATGLRNSPQRERRRRKGLFGAIAAGFIEG  
GWQGMVDGWYGYHHSNEQSGSYAADKESTQKAIDGVTNKVNSIIDKMNTQFEAVGREFNNLERRIENLNKKMEDGFLDVWVTYNAE  
LLVLMENERTLDFHDSNVKNLYDKVRLQLRDNAKELGNGCFEFYHKCDNECMESVRNGTYDYPQYSEEARLKREEISGVKLESIGTY  
QILSIYSTVASSLALAIMVAGLSLWMCSNGSLQCRIC

IAN2

MEKIVLLAIVSLVKSQDQICIGYHANNSTEQVDTIMEKNVTVTHAQDILEKTHNGKLCSLNGVKPLILKDCSVAGWLLGNPMCDEFLNVP  
EWSYIVEKDNPNANGLCYPGNFNDYEELKHLSSSTNHFEKIQIIPRSSWSNHDASSGVSSACPYNGRSSFFRNVVWLICKNNAYPTIKR  
SYNNTNQEDLLILWGIHPNDAAEQTKLYQNPTTYVSVGTSTLNQRSVPEIATRPKVNGQSGRMEFFWTILKPNDAINFESNGNFIAP  
EYAYKIVKKGDSAIMKSELEYGNCNTKCQTPMGAJNSSMPFHNIHPLTIGECPKYVKSBNKLVLATGLRNKPNQSPQRERRRRKGLFGA  
IAGFIEGGWQGMVDGWYGYHHSNEQSGSYAADKESTQKAIDGVTNKVNSIIDKMNTQFEAVGREFNNLERRIENLNKKMEDGFLDV  
WVTYNAELLVLMENERTLDFHDSNVKNLYDKVRLQLRDNAKELGNGCFEFYHKCDNECMESVRNGTYDYPQYSEEARLKREEISGVK  
LESIGTYQILSIYSTVASSLALAIMVAGLSLWMCSNGSLQCRIC

IAN3

MEKIVLPFAVISLVKSQDQICIGYHANNSTEQVDTIMEKNVTVTHAQDILEKTHNGKLCDLNGVKPLILKDCSVAGWLLGNPMCDEFIRVP  
EWSYIVERANPANDLCYPGNLNDYEELKHLISRINHFEKTIIPKSSWPNHETSLGVSAACPYQGTPSFFRNVVWLICKNDAYPTIKISY  
NNTNREDLLILWGIHHSNNAAEQTNLYKNPTTYVSVGTSTLNQRLVPKIATRSQVNGQGRMDFFWTILKPNDAIHFESNGNFIAP  
AYKIVKKGDSTIMKSEVEYGHNCNTKCQTPIGAINSSMPFHNIHPLTIGECPKYVKSBNKLVLATGLRNSPLNVPQRETRGLFGAIAAGFIEG  
GWQGMVDGWYGYHHSNEQSGSYAADKESTQKAIDGITNKVNSIIDKMNTQFEAVGKEFNNLERRIENLNKKMEDGFLDVWVTYNAEL  
LVLMEENERTLDFHDSNVKNLYDKVRLQLRDNAKELGNGCFEFYHKCDNECMESVRNGTYDYPQYSEEARLNREEISGVKLESMGT  
YQILSIYSTVASSLALAIMIAGLSFWMCSNGSLQCRIC

IAN4

MEKIVLLFAIVSLVKSQDQICIGYHANNSTEQVDTIMEKNVTVTHAQDILEKTHNGKLCDLNGVKPLILKDCSVAGWLLGNPMCDEFINVP  
EWSYIVEKANPANDLCYPGNFNDYEELKHLISRINHFEKIQIIPKDSWSDHEASLGVSAAACPYQGNSSFFRNVVWLICKNDAYPTIKKS  
YNNNTNQEDLLILWGIHPNDAAEQTRLYQNPTTYISVGTSTLNQRLVPKIATRISKVNGQSGRMDFFWTILKPNDAIHFESNGNFIAP  
YAYKIVKKGDSTIMKSEVEYGNCNTKCQTPIGAINSSMPFHNIHPLTIGECPKYVKSBNKLVLATGLRNSPQNVPPQRETRGLFGAIAAGFIE  
GGWQGMVDGWYGYHHSNEQSGSYAADKESTQKAIDGITNKVNSIIDKMNTQFEAVGKEFNNLERRIENLNKKMEDGFLDVWVTYNA  
ELLVLMENERTLDFHDSNVKNLYDKVRLQLRDNAKELGNGCFEFYHKCDNECMESVRNGTYDYPQYSEEARLNREEISGVKLESMG  
TYQILSIYSTVASSLALAIMIAGLSFWMCSNGSLQCRIC

IAN5

MEKIVLLAIVSLVKSQDQICIGYHANNSTEQVDTIMEKNVTVTHAQDILEKTHNGKLCSLNGVKPLILKDCSVAGWLLGNPMCDEFLNVP  
EWSYIVEKDNPNANGLCYPGNFNDYEELKHLSSSTNHFEKIQIIPRSSWSNHDASSGVSSACPYNGRSSFFRNVVWLICKNNAYPTIKR  
SYNNTNQEDLLILWGIHPNDAAEQTKLYQNPTTYVSVGTSTLNQRSVPEIATRPKVNGQSGRMEFFWTILKPNDAINFESNGNFIAP  
EYAYKIVKKGDSAIMKSELEYGNCNTKCQTPVGAINSSMPFHNIHPLTIGECPKYVKSBNKLVLATGLRNIPQNSPQRERRRRKGLFGAIA  
AGFIEGGWQGMVDGWYGYHHSNEQSGSYAADKESTQKAIDGVTNKVNSIIDKMNTQFEAVGREFNNLERRIENLNKKMEDGFLDV  
WVTYNAELLVLMENERTLDFHDSNVKNLYDKVRLQLRDNAKELGNGCFEFYHKCDNECMESVRNGTYDYPQYSEEARLKREEISGVK  
LESIGTYQILSIYSTVASSLALAIMVAGLSLWMCSNGSLQCRIC

IAN6

MEKIVLLFATISLVKSQDQICIGYHANNSTEQVDTIMEKNVTVTHAQDILEKTHNGKLCDLNGVKPLILKDCSVAGWLLGNPMCDEFIRVP  
EWSYIVERANPANDLCYPGSLNDYEELKHLISRINHFEKTIIPKSSWPNHETSLGVSAACPYQGTPSFFRNVVWLICKNDAYPTIKISY  
NNTNREDLLILWGIHHSNNAAEQTNLYKNPTTYVSVGTSTLNQRLVPKIATRSQVNGQGRMDFFWTILKPNDAIHFESNGNFIAP  
AYKIVKKGDSTIMKSEMEYGHNCNTKCQTPIGAINSSMPFHNIHPLTIGECPKYVKSBNKLVLATGLRNSPLNSPQRERRRRKGLFGAIA  
FIEGGWQGMVDGWYGYHHSNEQSGSYAADKESTQKAIDGVTNKVNSIIDKMNTQFEAVGREFNNLERRIENLNKKMEDGFLDVWT  
YNAELLVLMENERTLDFHDSNVKNLYDKVRLQLRDNAKELGNGCFEFYHKCDNECMESVRNGTYDYPQYSEEARLKREEISGVKLE  
SIGTYQILSIYSTVASSLALAIMVAGLSLWMCSNGSLQCRIC

## IAN7

MENIVLLLAIVSLVKSDQICIGYHANNSTEQVDTIMEKNVTVTTHAQDILEKTHNGKLCDLNGVKPLILKDCSVAGWLLGNPMCDEFIRVP  
EWSYIVERANPANDLCYPGNLNDYEELKHLLSRINHFEKIIIPKSSWPNHETSLGVSAACPYQGTPSFFRNVVWLIKKNDAYPTIKISY  
NNTNREDLLILWGIHHSNNAEQTNLYKNPTTYISVGTSTLNQRLVPKIATRSQVNGQRGRMDFFWTILKPNDAIHFESNGNFIAP EYA  
YKIVKKGDSTIMKSEVEYGH CNTKCQTPIGAINSSMPFHNIHPLTIGECPKYVKS NKLVLATGLRNSPLNSPQRERRRRKRGLFGAIA GFI  
EGGWQGMVDGWYGYHHSNEQGSGYAADKESTQKAIDGVTNKVNSIIDKMNTQFEAVGREFNNLERRIENLNKKMEDGFLDVWTYN  
AELLVLMENERTLDFHDSNVKNLYDKVRLQLKDNAKELGNGCFEFYHKCNNECMESVRNGTYDYPQYSEEARLKREEISGVKLESIG  
IYQILSIYSTVASSLVLAIMMAGLSLWMCSNGSLQCRIC I

## IAN8

MEKIVLLFAIVSLVKSDQICIGYHANNSTEQVDTIMEKNVTVTTHAQDILEKTHNGKLCDLNGVKPLILKDCSVAGWLLGNPMCDEFINVP  
EWSYIVEKANPANDLCYPGNFNDYEELKHLLSRINHFEKIIIPKSSWSDHEASLGVSAACPYQGNSSFFRNVVWLIKKNAYPTIKKS  
YNNTNQEDLLVLWGIHHPNDAAEQTRLYQNPTTYISVGTSTLNQRLVPKIATRSKVNGQSGRMDFFWTILKPNDAIHFESNGNFIAP E  
YAYKIVKKGDSTIMKSELEYGNCNTKCQTPIGAINSSMPFHNIHPLTIGECPKYVKS NKLVLATGLRNSPQNPSQRERRRRKRGLFGAIA  
GFIEGGWQGMVDGWYGYHHSNEQGSGYAADKESTQKAIDGVTNKVNSIIDKMNTQFEAVGREFNNLERRIENLNKKMEDGFLDVW  
TYNAELLVLMENERTLDFHDSNVKNLYDKVRLQLKDNAKELGNGCFEFYHKCNNECMESVRNGTYDYPQYSEEARLKREEISGVKL  
ESIGIYQILSIYSTVASSLVLAIMMAGLSLWMCSNGSLQCRIC I

**Figure S1.** Amino Acid sequences represented from each vaccine. Leader sequence is highlighted in light grey, HA1 sequence in white, HA2 sequence in dark grey.

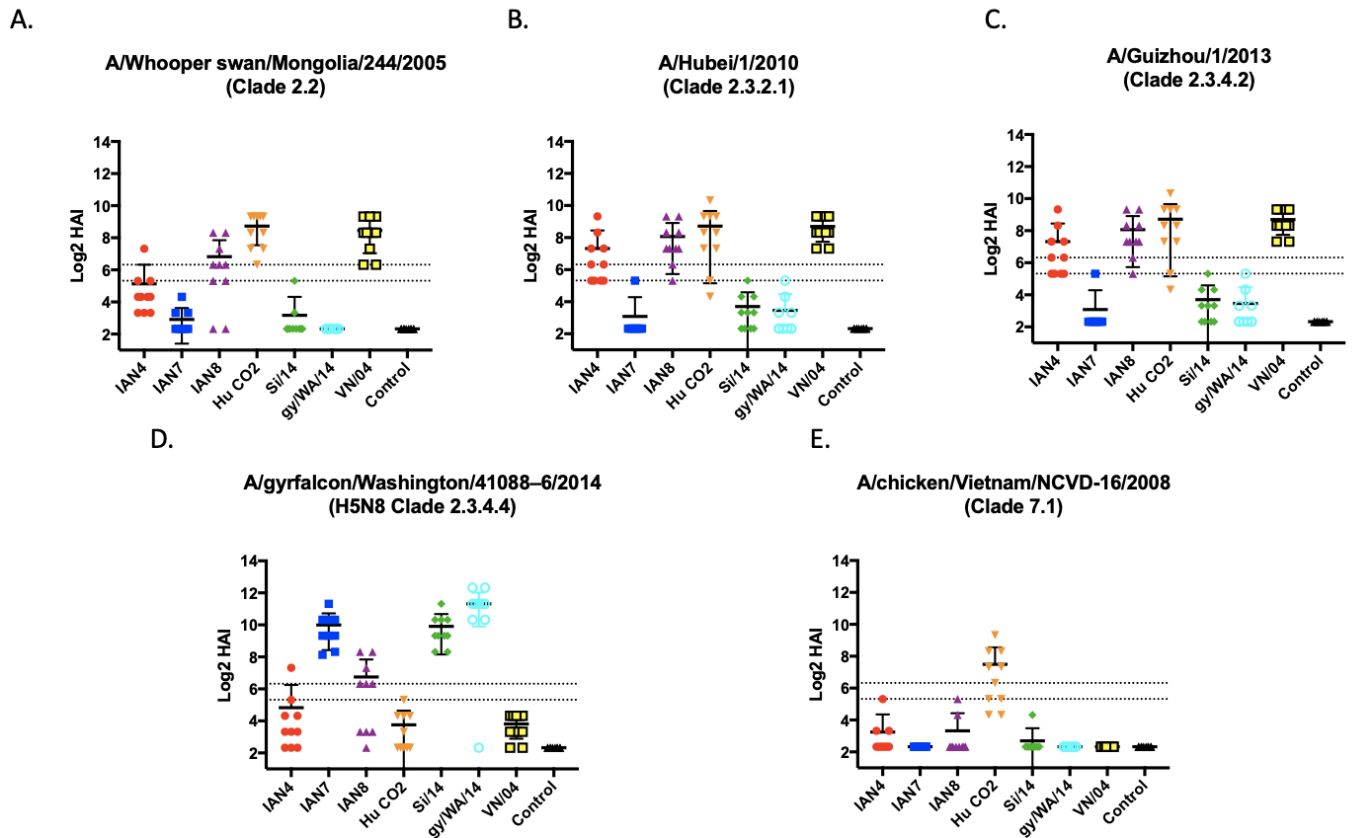

**Figure S2:** Virus HAI antibody panel from next generation COBRA vaccines. Five viruses from 4 viral clades were chosen to represent clades that are currently circulating around the globe in wild waterfowl populations. The virus panel is arranged from newest virus (2014) to the oldest (2005). The viral clades include 2.3.4.4, 2.3.2.1, 2.3.4.2 and 2.2 respectively. IAN-4, IAN-7 and IAN-8 were chosen to continue with further studies. Other vaccines were excluded due to their similar breath to wildtype vaccines or lack of immunogenicity.

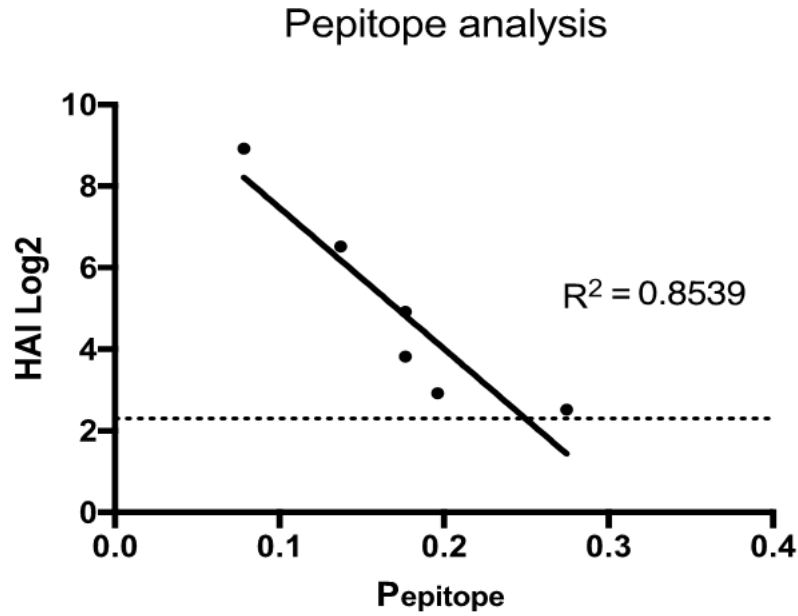

$$P_{sequence} = \frac{\text{Number of substitutions in the HA1 RBS domain of hemagglutinin}}{\text{Total number of amino acids in the HA1 RBS domain of hemagglutinin}}$$

**Figure S3.** Pepitope analysis of HAI data plotted against amino acid sequence similarity. There were 51 amino acids total analyzed in the HA1 portion of the H5 molecule. Amino acid sequences were aligned and analyzed using Geneious® software. the number of amino acid differences was divided by the total amino acid epitopes associated with the RBS. Linear regression analysis was performed on all strains of virus and vaccine HAI titer, there was a significant correlation between HAI titer and Psequence.

| <b>Vaccine</b> | <b>Sequences used</b>       |
|----------------|-----------------------------|
| IAN-1          | Traditional COBRA 2013-2017 |
| IAN-2          | Rolling COBRA 2011-2015     |
| IAN-3          | Rolling COBRA 2011-2015     |
| IAN-4          | Rolling COBRA 2012-2016     |
| IAN-5          | Rolling COBRA 2011-2015     |
| IAN-6          | Rolling COBRA 2012-2016     |
| IAN-7          | Rolling COBRA 2014-2018     |
| IAN-8          | Rolling COBRA 2011-2016     |

**Table S1:** Table of recombinant HA proteins used to vaccinate mice in preliminary serological study. BALB/c female mice were vaccinated on a prime-boost-boost regimen with soluble recombinant HA protein in combination with an oil-in-water emulsion Addavax adjuvant. COBRA vaccines termed IAN-1 – IAN-8 were used along with wild-type comparators to compare the antibodies elicited in a HAI panel.
